# Supplementary material
Source: HighWire-hosted journal article supplement (https://gut.bmj.com/content/gutjnl-2018-316307)
Supplement: inline-supplementary-material-1 [file inline-supplementary-material-1.pdf]

## **SUPPLEMENTARY INFORMATION**

### **Small Metabolites, Possible Big Changes—a Microbiota-centered View of Non-alcoholic Fatty Liver Disease**

Huikuan Chu<sup>a,b</sup>, Yi Duan<sup>b,c</sup>, Ling Yang<sup>a</sup>, Bernd Schnabl<sup>b,c,\*</sup>

<sup>a</sup>Division of Gastroenterology, Union Hospital, Tongji Medical College, Huazhong University of Science and Technology, Wuhan 430022, China

<sup>b</sup>Department of Medicine, University of California San Diego, La Jolla, CA 92093, USA;

<sup>c</sup>Department of Medicine, VA San Diego Healthcare System, San Diego, CA 92161, USA.

\*Corresponding Author: Bernd Schnabl, MD

Department of Medicine

University of California, San Diego

9500 Gilman Drive, MC0063

La Jolla, CA 92093

Phone: +1 858-822-5311, Fax: +1 858-822-5370

E-mail: [beschnabl@ucsd.edu](mailto:beschnabl@ucsd.edu)

**Supplementary Table 1 Change of metabolites associated with NAFLD in feces**

| Disease                      | comparison    | Change of metabolites                                                                                                                                                                                                                                                                                                                                                                                                                                                                                                               |                                                                                                                                                                                                                                                                                                                                                                            |                    | Method                            | Ref         |
|------------------------------|---------------|-------------------------------------------------------------------------------------------------------------------------------------------------------------------------------------------------------------------------------------------------------------------------------------------------------------------------------------------------------------------------------------------------------------------------------------------------------------------------------------------------------------------------------------|----------------------------------------------------------------------------------------------------------------------------------------------------------------------------------------------------------------------------------------------------------------------------------------------------------------------------------------------------------------------------|--------------------|-----------------------------------|-------------|
|                              |               | Increased                                                                                                                                                                                                                                                                                                                                                                                                                                                                                                                           | Decreased                                                                                                                                                                                                                                                                                                                                                                  |                    |                                   |             |
| NAFLD(n=11)<br>Healthy(n=22) | vs<br>Healthy | ethanol; lysine                                                                                                                                                                                                                                                                                                                                                                                                                                                                                                                     | SCFAs (specifically formate, acetate, and valerate); alanine                                                                                                                                                                                                                                                                                                               | <sup>1</sup> H NMR | Michail S[1]                      |             |
| NAFLD(n=53)<br>Healthy(n=54) | vs<br>Healthy | 4-methyl-2-pentanone; 1-butanol; 2-butanone                                                                                                                                                                                                                                                                                                                                                                                                                                                                                         | aromatic hydrocarbons; hydrazines                                                                                                                                                                                                                                                                                                                                          | GC-MS              | Del Chierico[2]                   |             |
| NAFLD(n=30)<br>Healthy(n=30) | vs<br>Healthy | butanoic acid, propyl ester; propanoic acid, propyl ester; acetic acid, ethyl ester; acetic acid, 3-methyl-, butyl ester; n-Propyl acetate; butanoic acid, butyl ester; propanoic acid, ethyl ester; pentanoic acid, methyl ester; acetic acid, methyl ester; 2-propynoic acid methyl ester; butanoic acid, 3-methyl-, ethyl ester; propanoic acid, 2-methyl-, propyl ester; cyclohexene, 4-ethenyl-4-methyl-3-(1-methylethenyl)-1-(1-methylethyl)-, (3Rtrans)-; phellandrene; 1,6-octadien-3-ol, 3,7-dimethyl; myrcene; 1-propanol | 2-butanone; furan, 2-methyl; heptanal 2(3H)-furanone, dihydro-5-methyl; 2-heptanone, 6-methyl; 2,3-pentanedione; 1,6-Octadien-3-ol, 3,7-dimethyl-, 2-aminobenzoate; cyclohexanol, 5-methyl-2-(1-methylethyl)-; 2-octene, 3,7-dimethyl-, (Z)-; 3-hexanone, 2-methyl-; acetic acid, (1,2,3,4,5,6,7,8-octahydro-3,8,8-trimethylnaphth-2-yl) methyl ester; cyclohexane, hexyl- | GC-MS              | Raman M[3]                        |             |
| NAFLD(n=86)                  | enrichment    | ethanol; 1-lactate; formate; acetate; D-lactate; succinate; butyrate/acetate; butyrate; propionate                                                                                                                                                                                                                                                                                                                                                                                                                                  |                                                                                                                                                                                                                                                                                                                                                                            |                    | UHLC/MS/MS <sup>2</sup> and GC/MS | Loomba R[4] |

Comparison of condition A vs condition B: Increased signifies an increase in condition A relative to condition B. Decreased signifies a decrease in condition A relative to condition B.  
NAFLD: non-alcoholic fatty liver disease; SCFAs: short-chain fatty acids; <sup>1</sup>H NMR: proton NMR; GC-MS: gas chromatography-mass spectrometry; UHLC/MS/MS<sup>2</sup>: ultrahigh performance liquid chromatography/tandem mass spectrometry; GC/MS: gas chromatography/mass spectrometry.

| Supplementary Table 2 Change of metabolites associated with NAFLD in serum/plasma |                              |                                                                                                                                                                                                                                                                                                                                                                                                                                                                                                                                                                                                                                                                                                                |                                                                                                                                                                                                                                                                      |                                    |
|-----------------------------------------------------------------------------------|------------------------------|----------------------------------------------------------------------------------------------------------------------------------------------------------------------------------------------------------------------------------------------------------------------------------------------------------------------------------------------------------------------------------------------------------------------------------------------------------------------------------------------------------------------------------------------------------------------------------------------------------------------------------------------------------------------------------------------------------------|----------------------------------------------------------------------------------------------------------------------------------------------------------------------------------------------------------------------------------------------------------------------|------------------------------------|
| Disease                                                                           | Comparison                   | Change of metabolites                                                                                                                                                                                                                                                                                                                                                                                                                                                                                                                                                                                                                                                                                          | Method and Ref                                                                                                                                                                                                                                                       |                                    |
|                                                                                   |                              | Increased                                                                                                                                                                                                                                                                                                                                                                                                                                                                                                                                                                                                                                                                                                      | Decreased                                                                                                                                                                                                                                                            |                                    |
| NAFLD(n=15)<br>Non-NAFLD(n=30)<br>at baseline                                     | NAFLD vs<br>Non NAFLD        | monoetherglycerophosphocholineO_plasmenyles;<br>monoetherglycerophosphocholineP_plasmenyles;<br>1-monoetherglycerophosphocholine; L-cystine to L-glutamate ratio                                                                                                                                                                                                                                                                                                                                                                                                                                                                                                                                               | 1-ether, 2-acylglycerophosphocholine<br>P_plasmenyles;ceramides; N-acyl ceramides;<br>N-acyl sphingosines; total sphingolipids;sum of triacylglycerols & cholesteryl esters; activity index of sphingomyelinase (Cer/SM)                                             | LC-MS/MS, serum<br>Papandreou C[5] |
| NAFLD(n=75)<br>Lean normal control(n=50)                                          | NAFLD vs Lean normal control | total plasma fatty acids; total saturated fatty acids; monounsaturated fatty acids; palmitoleic(16:1 n7) acid; oleic(18:1 n9) acid; vaccenic (18:1 n7) acid; DAG; TAG; DAG and TAG; palmitoleic (16:1 n7), oleic (18:1 n9); PC, PE, and LyPC; palmitoleic acid (16:1 n7), stearic acid (18:0), stearic (18:0) acid to palmitic (16:0) acid ratio; monounsaturated fatty acids; palmitoleic acid (16:1 n7) to palmitic acid (16:0) ratio, oleic acid (18:1 n9); polyunsaturated fatty acids: gamma-linolenic (18:3n6) acids, dihomo $\gamma$ -linolenic (20:3n6) acids, linoleic acid (18:2n6), dihomo $\gamma$ -linolenic acid (20:3n6), docosapentaenoic acid (DPA, 22:5n3); 5-HETE; 8-HETE; 15-HETE; 11-HETE | DAG and TAG: stearic acid (18:0), lignoceric acid (24:0), behenic acid (22:0); monounsaturated fatty acids: stearic acid (18:0); polyunsaturated fatty acids: linoleic acid (18: 2n6), $\alpha$ -linolenic acid (18:3n3), DHA:DPA ratio; plasmalogen (dm) and dm16:0 | GC and LC-MS, plasma<br>Puri P[6]  |
| NAFLD(n=914)<br>Healthy(n=714)                                                    | NAFLD vs Healthy             | TMAO                                                                                                                                                                                                                                                                                                                                                                                                                                                                                                                                                                                                                                                                                                           | betaine                                                                                                                                                                                                                                                              | HPLC-MS/MS, serum<br>Chen YM[7]    |
| NASH(n=16)<br>Healthy(n=11)                                                       | NASH vs Healthy              | total bile acid; CA; CDCA; DCA; UDCA; secondary bile acids to primary bile acids ratio; DCA to CDCA ratio                                                                                                                                                                                                                                                                                                                                                                                                                                                                                                                                                                                                      |                                                                                                                                                                                                                                                                      | LC-MS/MS, serum<br>Jiao N[8]       |

| Supplementary Table 2 continued                                |                                                                    |                                                                                                                                                                                                                                                                                                                                                                                                                                                                                                                                                                                                                                                                  |                                                                      |
|----------------------------------------------------------------|--------------------------------------------------------------------|------------------------------------------------------------------------------------------------------------------------------------------------------------------------------------------------------------------------------------------------------------------------------------------------------------------------------------------------------------------------------------------------------------------------------------------------------------------------------------------------------------------------------------------------------------------------------------------------------------------------------------------------------------------|----------------------------------------------------------------------|
| Disease                                                        | Comparison                                                         | Change of metabolites                                                                                                                                                                                                                                                                                                                                                                                                                                                                                                                                                                                                                                            | Method and Ref                                                       |
|                                                                |                                                                    | <b>Increased</b>                                                                                                                                                                                                                                                                                                                                                                                                                                                                                                                                                                                                                                                 | <b>Decreased</b>                                                     |
| NASH(n=7)<br>Healthy(n=15)                                     | NASH vs<br>Healthy                                                 | total bile acid; taurine-conjugated bile acids; glycine-conjugated bile acids; primary bile acids; secondary bile acids; CA; LCA; CDCA; DCA; UDCA                                                                                                                                                                                                                                                                                                                                                                                                                                                                                                                | UPLC-MS/MS, serum<br>Ferslew BC[9]                                   |
| NAFLD(n=64)<br>Healthy(n=64)                                   | NAFLD vs<br>Healthy<br>NASH vs<br>Not-NASH                         | homocysteine; cysteine; cysteinylglycine                                                                                                                                                                                                                                                                                                                                                                                                                                                                                                                                                                                                                         | HPLC, plasma<br>Pastore A[10]                                        |
| Obese patients with<br>NAFLD(n=154)<br>patients<br>NAFLD(n=76) | Obese patients with<br>NAFLD vs<br>Obese patients without<br>NAFLD | leucine; isoleucine; valine; 3-methyl-2-oxobutyrate; 3-hydroxybutyrate; 1,5-anhydroglucitol ;<br>3-methyl-2-oxovalerate; 4-methyl-2-oxopentanoate; 4-androsten-3 $\beta$ ; 17- $\beta$ -dioldisulphate 1; 17- $\beta$ -diol<br>$\alpha$ -ketoglutarate; succinylcarnitine; bradykinin; disulphate 2; 5 $\alpha$ -androstan-3 $\beta$ ; 5 $\alpha$ -pregnan-3 $\beta$ ;<br>des-Arg9-bradykinin; dicarboxylic acid 20 $\alpha$ -diol disulphate; pregnen-diol disulphate; pregnen MS, plasma<br>2-hydroxybutyrate( $\alpha$ -hydroxybutyrate); glycocholate; steroid monosulphate; andro steroid monosulphate 2;<br>taurocholate 21-hydroxypregnenolone disulphate | Rodríguez-Gallego E[11]                                              |
| NAFLD(n=32)<br>Healthy(n=28)                                   | NAFLD vs<br>Healthy                                                | lactate; glutamate; glucose; taurine                                                                                                                                                                                                                                                                                                                                                                                                                                                                                                                                                                                                                             | <sup>1</sup> H NMR, serum<br>Li H[12]                                |
| NAFLD(n=105)<br>Healthy(n = 48)                                | NAFLD vs<br>Healthy                                                | 16-OH-DHEA-S                                                                                                                                                                                                                                                                                                                                                                                                                                                                                                                                                                                                                                                     | CE-TOF-MS and LC-TOF-MS, serum<br>Tokushige K[13]                    |
| Obese patients with<br>NAFLD(n=24)<br>NASH(n=9)                | NAFLD vs<br>Control                                                | LPC; DCA; sphingomyelin: (SM 36:3), (d18:2/16:0), (d18:2/14:0), (d18:1/18:0), (d18:1/16:0), (d18:1/12:0), (d18:0/16:0); arachidonic acid                                                                                                                                                                                                                                                                                                                                                                                                                                                                                                                         | UPLC-MS, serum<br>Barr J[14]                                         |
| Obese patients without<br>NAFLD(n=9)                           | NASH vs<br>NAFLD                                                   | PC(14:0/20:4); LPC(18:1)                                                                                                                                                                                                                                                                                                                                                                                                                                                                                                                                                                                                                                         | LPC(24:0); arachidonic acid(20:4n-6); PC(P-24:0/0:0); PC(P-22:0/0:0) |

| Supplementary Table 2 continued |                              |                                                                                                                                                                                                                                                                                                                                                                                                                                                                                                                      |                                                                                                                                                                                            |
|---------------------------------|------------------------------|----------------------------------------------------------------------------------------------------------------------------------------------------------------------------------------------------------------------------------------------------------------------------------------------------------------------------------------------------------------------------------------------------------------------------------------------------------------------------------------------------------------------|--------------------------------------------------------------------------------------------------------------------------------------------------------------------------------------------|
| Disease                         | Comparison                   | Change of metabolites                                                                                                                                                                                                                                                                                                                                                                                                                                                                                                | Method and Ref                                                                                                                                                                             |
|                                 |                              | Increased                                                                                                                                                                                                                                                                                                                                                                                                                                                                                                            | Decreased                                                                                                                                                                                  |
| NAFL(n=25)                      | NAFLD vs Non-NAFLD           | proportion of total plasma primary BAs; GCA; TCA; GCDCA; TCDCa; glyoursodeoxycholate; tauroursodeoxycholate; DCA; ratio of conjugated to unconjugated CA; ratio of conjugated to unconjugated CDCA; ratios of the total CA to total CDCA; hydrophilic trihydroxy bile acids                                                                                                                                                                                                                                          | proportion of total secondary BAs; hydrophobic bile acids to hydrophilic bile acids ratio                                                                                                  |
| NASH(n=37)                      |                              |                                                                                                                                                                                                                                                                                                                                                                                                                                                                                                                      |                                                                                                                                                                                            |
| Non-NAFLD(n=24)                 | NASH vs NAFL                 | proportion of total plasma primary BAs; GCA; TCA; GCDCA; TCDCa; glyoursodeoxycholate; tauroursodeoxycholate; ratio of conjugated to unconjugated CA; ratio of conjugated to unconjugated CDCA;                                                                                                                                                                                                                                                                                                                       | proportion of total secondary BAs                                                                                                                                                          |
| Hepatic steatosis (n=11)        | Hepatic steatosis vs Healthy | homocysteine; cysteine; taurocholate; glutamyl dipeptides; glutamyl valine; glutamyl leucine; glutamyl phenylalanine; glutamyl tyrosine; free carnitine; butyrcarnitine; gamma-glutamylphenylalanine; gamma-glutamyltyrosine; mannose; lactate; erythronate; glutamate; lysine; tyrosine; isoleucine; glycocholate; glycochenodeoxycholate; propionylcarnitine; 2-methylbutyrylcarnitine; glucose; pyruvate; phenylalanine; branched chain amino acids; leucine; valine; aspartate; others(e.g.,x-11546 and x-11529) | glutathione; cysteine-glutathione disulfide; caprate(C10:0); 10-undecenoate(C11:1n1); eicosopentaenoate(C20:5n3); docosohexaenoate(C22:6n3); arachidonate(C20:4n6); glycerophosphocholine; |
| NASH(n=24)                      |                              |                                                                                                                                                                                                                                                                                                                                                                                                                                                                                                                      |                                                                                                                                                                                            |
| Healthy(n=25)                   | NASH vs. Steatosis           | glutamate; creatine; pyruvate; unknown X-0191_200                                                                                                                                                                                                                                                                                                                                                                                                                                                                    | undecenoate(C11:0); linolenate(alpha or gamma); linolenate(C18:3n3 or 6)                                                                                                                   |
|                                 |                              |                                                                                                                                                                                                                                                                                                                                                                                                                                                                                                                      | LC/MS, plasma<br>Puri P[15]<br>UHLC/MS/MS and GC/MS, plasma<br>Kalhan SC[16]                                                                                                               |

| Supplementary Table 2 continued                                               |                                           |                                                                                                                                                                                                                                                                                                                                                                                                                                                                                                                                                                                                                                                                                                                                                                                                                                                                                                                                                                                                                                                                                                                                                                                                                                |                                                                                                                                     |
|-------------------------------------------------------------------------------|-------------------------------------------|--------------------------------------------------------------------------------------------------------------------------------------------------------------------------------------------------------------------------------------------------------------------------------------------------------------------------------------------------------------------------------------------------------------------------------------------------------------------------------------------------------------------------------------------------------------------------------------------------------------------------------------------------------------------------------------------------------------------------------------------------------------------------------------------------------------------------------------------------------------------------------------------------------------------------------------------------------------------------------------------------------------------------------------------------------------------------------------------------------------------------------------------------------------------------------------------------------------------------------|-------------------------------------------------------------------------------------------------------------------------------------|
| Disease                                                                       | Comparison                                | Change of metabolites                                                                                                                                                                                                                                                                                                                                                                                                                                                                                                                                                                                                                                                                                                                                                                                                                                                                                                                                                                                                                                                                                                                                                                                                          | Method and Ref                                                                                                                      |
|                                                                               |                                           | <b>Increased</b>                                                                                                                                                                                                                                                                                                                                                                                                                                                                                                                                                                                                                                                                                                                                                                                                                                                                                                                                                                                                                                                                                                                                                                                                               | <b>Decreased</b>                                                                                                                    |
| NAFLD(n=56)                                                                   | NAFLD enrichment                          | <p>succinate; malate; <math>\alpha</math>-ketoglutarate; glutamine; serine; fumarate; <math>\alpha</math>-ketobutyrate, glutamate; lactate; hypoxanthine; inosine</p> <p>2-hydroxy-3-methylvalerate; 3-(4-hydroxyphenyl)lactate; 3-methyl-2-oxobutyrate; 3-methyl-2-oxovalerate; 4-acetamidobutanoate; 4-methyl-2-oxopentanoate; C-glycosyltryptophan*; creatinine; indolelactate; isoleucine; kynurenate; leucine; N6-acetyllysine; N-acetylisoleucine; N-acetylphenylalanine; N-acetylvaline; N-formylmethionine; phenylalanine; phenyllactate(PLA); S-adenosylhomocysteine(SAH); valine; erythronate*; glucose; lactate; mannitol; sorbitol; malate; succinylcamitine; 3-hydroxy-3-methylglutarate; 4-androsten-3beta, 17beta-diol disulfate(1); maleate(cis-Butenedioate); TL 18:1n9(oleic acid); 7-methylguanaine; allantoin; N1-methyladenosine; N1-methylguanosine; N2,N2-dimethylguanosine; N6-carbamoylthreonyladenosine; N6-succinyladenosine; orotidine; psuedouridine; urate; xanthosine; cyclo(leu-pro); cyclo(L-phe-L-pro); gamma-glutamylisolecine*; gamma-glutamylleucine; gamma-glutamylphenylalanine; gamma-glutamylvaline; prolylglycine; pyroglutamylvaline; 1,3,7-trimethylurate; N-(2-fuyoylglycine)</p> | <p>UHLC/MS/MS<sup>2</sup> and GC/MS, serum</p> <p>Loomba R[4]</p>                                                                   |
| NAFLD (n = 36)<br>Non-NAFLD (n = 120)                                         | NAFLD vs Non NAFLD                        | <p>leucine; valine; gamma-glutamylleucine; 4-androsten-3beta, 17beta-diol disulfate(1); gamma-glutamylvaline</p>                                                                                                                                                                                                                                                                                                                                                                                                                                                                                                                                                                                                                                                                                                                                                                                                                                                                                                                                                                                                                                                                                                               | <p>UPLC-MS/MS and GC-MS, serum</p> <p>Caussy C[17]</p>                                                                              |
| No advanced fibrosis(stage 0-2)(n=133)<br>Advanced fibrosis (stage 3-4)(n=23) | Advanced fibrosis vs No advanced fibrosis | <p>malate; sorbitol; 3-(4-hydroxyphenyl)lactate; 7-methylguanaine; cyclo(leu-pro); cyclo(L-phe-L-pro)</p>                                                                                                                                                                                                                                                                                                                                                                                                                                                                                                                                                                                                                                                                                                                                                                                                                                                                                                                                                                                                                                                                                                                      | <p>leucine; creatinine; urate; valine; gamma-glutamylleucine; 4-androsten-3beta, 17beta-diol disulfate(1); gamma-glutamylvaline</p> |

| Supplementary Table 2 continued                                                                                                                                                                                                                                                                                                                                                                                                                                                                                                                                                                                                                                                                                                                                                                                                                                                                                                                                                                                                                                                                                                                                                                                                                                                                                                                                                                                                                                                                                                                                |                             |                                                                                                                                                                                                                                                                                                                                                                                              |                                                                                                                                                             |                                     |
|----------------------------------------------------------------------------------------------------------------------------------------------------------------------------------------------------------------------------------------------------------------------------------------------------------------------------------------------------------------------------------------------------------------------------------------------------------------------------------------------------------------------------------------------------------------------------------------------------------------------------------------------------------------------------------------------------------------------------------------------------------------------------------------------------------------------------------------------------------------------------------------------------------------------------------------------------------------------------------------------------------------------------------------------------------------------------------------------------------------------------------------------------------------------------------------------------------------------------------------------------------------------------------------------------------------------------------------------------------------------------------------------------------------------------------------------------------------------------------------------------------------------------------------------------------------|-----------------------------|----------------------------------------------------------------------------------------------------------------------------------------------------------------------------------------------------------------------------------------------------------------------------------------------------------------------------------------------------------------------------------------------|-------------------------------------------------------------------------------------------------------------------------------------------------------------|-------------------------------------|
| Disease                                                                                                                                                                                                                                                                                                                                                                                                                                                                                                                                                                                                                                                                                                                                                                                                                                                                                                                                                                                                                                                                                                                                                                                                                                                                                                                                                                                                                                                                                                                                                        | Comparison                  | Increased                                                                                                                                                                                                                                                                                                                                                                                    | Decreased                                                                                                                                                   | Method and Ref                      |
| Simple steatosis (n =9)<br>NASH (n = 11)                                                                                                                                                                                                                                                                                                                                                                                                                                                                                                                                                                                                                                                                                                                                                                                                                                                                                                                                                                                                                                                                                                                                                                                                                                                                                                                                                                                                                                                                                                                       | NASH vs<br>Simple steatosis |                                                                                                                                                                                                                                                                                                                                                                                              | <p>γ-glutamyl dipeptides (γ-Glu-Val; γ-Glu-Thr; γ-Glu-Leu, γ-Glu-His; γ-Glu-Phe; γ-Glu-Arg)</p>                                                             | LC-MS/MS, serum<br>Soga T[18]       |
| NAFLD(n=102)                                                                                                                                                                                                                                                                                                                                                                                                                                                                                                                                                                                                                                                                                                                                                                                                                                                                                                                                                                                                                                                                                                                                                                                                                                                                                                                                                                                                                                                                                                                                                   | NAFLD activity score        | <p>glycoprotein (2.03 ppm); lactate (1.35 ppm); VLDL lipid (0.88 ppm); leucine (1.73 ppm); leucine (1.70 ppm); isoleucine (1.01 ppm); phenylacetate (7.39 ppm); leucine (0.95 ppm); alanine (1.46 ppm); valine (0.97 ppm); valine (1.02 ppm); citrate (2.51 ppm); citrate (2.67 ppm); alanine (3.79 ppm); alanine (1.48 ppm); lactate (4.12 ppm); glucose (3.90 ppm); glucose (3.88 ppm)</p> | <p>histidine (7.04 ppm); acetate (1.91 ppm); small albumin lysyl (2.98 ppm); choline (3.21 ppm); phosphocholine (3.22 ppm); scyllo-Inositol (3.35 ppm);</p> | <sup>1</sup> H NMR, plasma<br>L[19] |
| <p>Comparison of condition A vs condition B: Increased signifies an increase in condition A relative to condition B. Decreased signifies a decrease in condition A relative to condition B.</p> <p>NAFLD: non-alcoholic fatty liver disease; LC-MS/MS: liquid chromatography tandem mass spectrometry; DAG: diacylglycerol; TAG: triacylglycerol; HETE: hydroxyicosatetraenoic acid; GC: gas chromatography; LC-MS: liquid chromatography-mass spectrometry; DHA: docosahexanoic acid; TMAO: trimethylamine N-oxide; HPLC-MS/MS: high-performance liquid chromatography tandem mass spectrometry; NASH: non-alcoholic steatohepatitis; CA: cholic acid; CDCA: chenodeoxycholic acid; DCA: deoxycholic acid; UDCA: ursodeoxycholic acid; LCA: lithocholate; UPLC-MS/MS: ultra-performance liquid chromatography tandem mass spectrometry; LC/GC-QTOF-MS: liquid and gas chromatography-quadrupole time-of-flight-mass spectrometry; <sup>1</sup>H NMR: proton NMR; DHEA-S: dehydroepiandrosterone sulfate; CE-TOF-MS: capillary electrophoresis time-of-flight-mass spectrometry; LPC: lysophosphatidylcholine; PC: phosphatidylcholine; UPLC-MS: ultra-performance liquid chromatography-mass spectrometry; GCA: glycocholate; TCDC: taurocholate; GCDCA: glycochenodeoxycholate; TCDC: taurochenodeoxycholate; LC/MS: liquid chromatography tandem mass spectrometry; UHLC/MS/MS: ultrahigh performance liquid chromatography/tandem mass spectrometry.; GC/MS: gas chromatography tandem mass spectrometry; GC-MS: gas chromatography-mass spectrometry.</p> |                             |                                                                                                                                                                                                                                                                                                                                                                                              |                                                                                                                                                             |                                     |

| Supplementary Table 3 change of metabolites associated with NAFLD in urine                                                                                                                                                                                                                                                                                                                                                 |                                         |                                                                                                                                                                                                                                                                                                                                                                                                                                                                                                                                                                                                                                                                                                                                                                                                                          |                                                                                                                                                                                                                                                                                                                            |                    |                 |                  |
|----------------------------------------------------------------------------------------------------------------------------------------------------------------------------------------------------------------------------------------------------------------------------------------------------------------------------------------------------------------------------------------------------------------------------|-----------------------------------------|--------------------------------------------------------------------------------------------------------------------------------------------------------------------------------------------------------------------------------------------------------------------------------------------------------------------------------------------------------------------------------------------------------------------------------------------------------------------------------------------------------------------------------------------------------------------------------------------------------------------------------------------------------------------------------------------------------------------------------------------------------------------------------------------------------------------------|----------------------------------------------------------------------------------------------------------------------------------------------------------------------------------------------------------------------------------------------------------------------------------------------------------------------------|--------------------|-----------------|------------------|
| Disease                                                                                                                                                                                                                                                                                                                                                                                                                    | Comparison                              | Increased                                                                                                                                                                                                                                                                                                                                                                                                                                                                                                                                                                                                                                                                                                                                                                                                                | Change of metabolites                                                                                                                                                                                                                                                                                                      | Decreased          | Method          | Ref              |
| NASH(n=7)<br>Healthy(n=15)                                                                                                                                                                                                                                                                                                                                                                                                 | NASH vs<br>Healthy                      | DCA; CA; CDCA; UDCA; 6 $\alpha$ -hydroxylated bile acid                                                                                                                                                                                                                                                                                                                                                                                                                                                                                                                                                                                                                                                                                                                                                                  |                                                                                                                                                                                                                                                                                                                            |                    | UPLC-M<br>S/MS  | Ferslew<br>BC[9] |
| NAFLD(n=12)<br>Healthy(n=14)                                                                                                                                                                                                                                                                                                                                                                                               | NAFLD vs<br>Healthy                     | glucose; 1-Methyl histidine(1-MHIs); sebatic acid; pseudo uridine(PSI); glucono-1,4-lactone; cresyl sulphate; cysteine                                                                                                                                                                                                                                                                                                                                                                                                                                                                                                                                                                                                                                                                                                   | glucose; gluconic acid; xilitol; 4-phenyl acetic acid; oleic acid; 4-Deoxyerythronate; oxalic acid; N-methyl nicotinate                                                                                                                                                                                                    |                    | GC-MS           | Troisi<br>J[20]  |
| NAFLD(n=33)<br>NASH(n=45)<br>Healthy(n=30)                                                                                                                                                                                                                                                                                                                                                                                 | NAFLD vs<br>Healthy<br>NASH vs<br>NAFLD | citruiline, arginine, valine; indole acetic acid; glucose; glutamine (2.47 ppm); 7-methylxanthine; 2-methylguanidine; indoxylsulfuric acid; lysine; threonine; tyrosine; leucine; hippuric acid; 3-indoleacetic acid; cAMP; acetyl-DL-leucine methyl xanthine; tryptophan; 3-indole acetic acid; gluconic acid; L-carnitine; pyroglutamic acid; indolelactic acid                                                                                                                                                                                                                                                                                                                                                                                                                                                        | hypoxanthine, xanthine, carnitine; 5-hydroxy indole acetic acid; indole-3-formic acid; cortisol<br>proline                                                                                                                                                                                                                 |                    | LC-MS           | Dong<br>S[21]    |
| NAFLD<br>activity<br>score                                                                                                                                                                                                                                                                                                                                                                                                 | NAFLD<br>activity<br>score              | citrate (2.66 ppm); valine (0.99 ppm); valine (1.00 ppm); glutamine (2.47 ppm); glutamine (2.46 ppm); lysine (1.71 ppm); lysine (1.73 ppm); $\alpha$ -Ketoisovalerate (1.12 ppm); paracetamol sulfate (7.33 ppm); creatinine (3.06 ppm); creatinine (4.07 ppm); alanine (3.18 ppm); 1-Methylnicotinamide (8.89 ppm); N-Acetyllalanine (2.03 ppm); choline (3.20 ppm); inosine (8.34 ppm); p-Hydroxyphenylpyruvate (6.67 ppm); 1-Methylnicotinamide (9.29 ppm); 1-Methylnicotinamide (8.91 ppm); inosine (8.33 ppm); pyruvate (2.37 ppm); oxaloacetate (2.38 ppm); 1-Methylnicotinamide (4.48 ppm); isoleucine (0.94 ppm); methylmalonate (1.24 ppm); $\alpha$ -Hydroxybutyrate (0.90 ppm); lysine (3.02 ppm); dimethylglycine (2.94 ppm); valine (1.05 ppm); $\alpha$ -Hydroxyisovalerate (0.97 ppm); leucine (0.96 ppm) | hippurate (7.64 ppm); hippurate (7.56 ppm); hippurate (7.85 ppm); hippurate (7.82 ppm); trigonelline (8.83 ppm); hippurate (3.98 ppm); histamine (7.12 ppm); p-Hydroxyphenylpyruvate (7.01 ppm); trigonelline (9.12 ppm); trigonelline (8.85 ppm); paracetamol glucuronide (5.11 ppm); paracetamol glucuronide (7.35 ppm); | <sup>1</sup> H NMR | Hoyles<br>L[19] |                  |
| Comparison of condition A vs condition B: Increased signifies an increase in condition A relative to condition B. Decreased signifies a decrease in condition A relative to condition B.                                                                                                                                                                                                                                   |                                         |                                                                                                                                                                                                                                                                                                                                                                                                                                                                                                                                                                                                                                                                                                                                                                                                                          |                                                                                                                                                                                                                                                                                                                            |                    |                 |                  |
| NASH: non-alcoholic; DCA: deoxycholic acids; CA: cholic acids; CDCA: chenodeoxycholic acid; UDCA: ursodeoxycholic acid; UPLC-MS/MS: ultra-performance liquid chromatography tandem mass spectrometry; NAFLD: non-alcoholic fatty liver disease; GC-MS: gas chromatography-mass spectrometry; cAMP: cyclic adenosine monophosphate protein; LC-MS: liquid chromatography-mass spectrometry; <sup>1</sup> H NMR: proton NMR. |                                         |                                                                                                                                                                                                                                                                                                                                                                                                                                                                                                                                                                                                                                                                                                                                                                                                                          |                                                                                                                                                                                                                                                                                                                            |                    |                 |                  |



| Supplementary Table 4 change of metabolites associated with NAFLD in liver                                                                                                                                                                                                                                                                                                                                                                                                                                                                |                                                              |                                                                                                                                                                                                                                                                                             |                                                                                                                                                                                                                        |                           |                         |
|-------------------------------------------------------------------------------------------------------------------------------------------------------------------------------------------------------------------------------------------------------------------------------------------------------------------------------------------------------------------------------------------------------------------------------------------------------------------------------------------------------------------------------------------|--------------------------------------------------------------|---------------------------------------------------------------------------------------------------------------------------------------------------------------------------------------------------------------------------------------------------------------------------------------------|------------------------------------------------------------------------------------------------------------------------------------------------------------------------------------------------------------------------|---------------------------|-------------------------|
| Disease                                                                                                                                                                                                                                                                                                                                                                                                                                                                                                                                   | Comparison                                                   | Change of metabolites                                                                                                                                                                                                                                                                       |                                                                                                                                                                                                                        | Method                    | Ref                     |
|                                                                                                                                                                                                                                                                                                                                                                                                                                                                                                                                           |                                                              | Increased                                                                                                                                                                                                                                                                                   | Decreased                                                                                                                                                                                                              |                           |                         |
| NAFLD(n=41)<br>Healthy(n=17)                                                                                                                                                                                                                                                                                                                                                                                                                                                                                                              | NAFLD<br>vs<br>Healthy                                       | GCDCa; TCA; TDCA; isoleucine; phenylalanine; tyrosine; valine; succinic acid; arachidonoyl-lyso-PC (20:4); butyryl carnitine (C4); lauryl carnitine (C12); stearyl carnitine (C18:0); tetradecanoyl carnitine(C14); 4-hydroxyproline; betaine; glucose; taurine                             | CA; DCA; histidine; methionine; tryptophan; creatine; arachidonic acid; choline; linoleic acid; stearoyl-lyso-PE (18:0)                                                                                                | LC-MS/MS                  | Han J[22]               |
| Obese patients with NAFLD(n=154)<br>Obese patients without NAFLD(n=76)                                                                                                                                                                                                                                                                                                                                                                                                                                                                    | Obese patients with NAFLD vs<br>Obese patients without NAFLD | leucine; isoleucine; valine;; 3-methyl-2-oxobutyrate; 3-methyl-2-oxovalerate; 4-methyl-2-oxopentanoate; 1; 17-β-diol disulphate 2; α-ketoglutarate; succinylcarnitine; bradykinin; des-Arg9-bradykinin; dicarboxylic acid 2-hydroxybutyrate (α-hydroxybutyrate); glycocholate; taurocholate | 3-hydroxybutyrate; 4-androsten-3β; 17-β-dioldisulphate 2; 5α-androstan-3β; 20α-diol disulphate; pregnen-diol disulphate; pregnen steroid monosulphate; andro steroid monosulphate 2; 21-hydroxypregnenolone disulphate | LC/GC-QT<br>OF-MS         | Rodríguez-Gallego E[11] |
| NASH(n=14)<br>Healthy(n=16)                                                                                                                                                                                                                                                                                                                                                                                                                                                                                                               | NASH vs<br>Healthy                                           | leucine; valine; isoleucine; betaine; succinate; lactate; propylene glycol                                                                                                                                                                                                                  |                                                                                                                                                                                                                        | <sup>1</sup> H-NMR        | Schofield Z[23]         |
| Steatosis(n=23)<br>Non-steatosis(n=23)                                                                                                                                                                                                                                                                                                                                                                                                                                                                                                    | Steatosis vs<br>Non-steatosis                                | dextrin; taurochenodeoxycholic acid; LysoPC(16:0); LysoPE(18:3); LysoPE(18:0/0:0); LysoPE(16:0/0:0); LysoPE(18:3); PC(36:2); PC(36:4)                                                                                                                                                       | glycochenodeoxycholate-3-sulfate; glycerophosphocholine; L-glutamyl-L-lysine; L-glutamic acid; GSH; GSSG; GSH/GSSG ratio                                                                                               | UPLC-Q-To<br>F            | García-Cañaveras JC[24] |
| NASH(n=15)<br>Normal control(n=8)                                                                                                                                                                                                                                                                                                                                                                                                                                                                                                         | NASH vs<br>Normal control                                    | CA; CDCA; DCA                                                                                                                                                                                                                                                                               |                                                                                                                                                                                                                        | gas-liquid chromatography | Aranha MM[25]           |
| Comparison of condition A vs condition B: Increased signifies an increase in condition A relative to condition B. Decreased signifies a decrease in condition A relative to condition B.                                                                                                                                                                                                                                                                                                                                                  |                                                              |                                                                                                                                                                                                                                                                                             |                                                                                                                                                                                                                        |                           |                         |
| NAFLD: non-alcoholic fatty liver disease; GCDCa: glycochenodeoxycholic acid; TDCA: taurodeoxycholic acid; TCA: taurocholic acid; CA: cholic acid; DCA: deoxycholic acid; LC-MS/MS: liquid chromatography tandem mass spectrometry; LC/GC-QTOF-MS: liquid and gas chromatography-quadrupole time-of-flight-mass spectrometry; <sup>1</sup> H NMR: proton NMR; GSH: glutathione; GSSG: glutathione disulfide; UPLC-Q-ToF: ultra-performance liquid chromatography-quadrupole time-of-flight mass spectrometry; CDCA: chenodeoxycholic acid. |                                                              |                                                                                                                                                                                                                                                                                             |                                                                                                                                                                                                                        |                           |                         |

## REFERENCES

- 1 Michail S, Lin M, Frey MR, *et al.* Altered gut microbial energy and metabolism in children with non-alcoholic fatty liver disease. *FEMS Microbiol Ecol* 2015;**91**:1-9.
- 2 Del Chierico F, Nobili V, Vernocchi P, *et al.* Gut microbiota profiling of pediatric nonalcoholic fatty liver disease and obese patients unveiled by an integrated meta-omics-based approach. *Hepatology* 2017;**65**:451-64.
- 3 Raman M, Ahmed I, Gillevet PM, *et al.* Fecal microbiome and volatile organic compound metabolome in obese humans with nonalcoholic fatty liver disease. *Clin Gastroenterol Hepatol* 2013;**11**:868-75 e1-3.
- 4 Loomba R, Seguritan V, Li W, *et al.* Gut Microbiome-Based Metagenomic Signature for Non-invasive Detection of Advanced Fibrosis in Human Nonalcoholic Fatty Liver Disease. *Cell Metab* 2017;**25**:1054-62 e5.
- 5 Papandreou C, Bullo M, Tinahones FJ, *et al.* Serum metabolites in non-alcoholic fatty-liver disease development or reversion; a targeted metabolomic approach within the PREDIMED trial. *Nutr Metab (Lond)* 2017;**14**:58.
- 6 Puri P, Wiest MM, Cheung O, *et al.* The plasma lipidomic signature of nonalcoholic steatohepatitis. *Hepatology* 2009;**50**:1827-38.
- 7 Chen YM, Liu Y, Zhou RF, *et al.* Associations of gut-flora-dependent metabolite trimethylamine-N-oxide, betaine and choline with non-alcoholic fatty liver disease in adults. *Sci Rep* 2016;**6**:19076.
- 8 Jiao N, Baker SS, Chapa-Rodriguez A, *et al.* Suppressed hepatic bile acid signalling despite elevated production of primary and secondary bile acids in NAFLD.

*Gut* 2017.

9 Ferslew BC, Xie G, Johnston CK, *et al.* Altered Bile Acid Metabolome in Patients with Nonalcoholic Steatohepatitis. *Dig Dis Sci* 2015;**60**:3318-28.

10 Pastore A, Alisi A, di Giovamberardino G, *et al.* Plasma levels of homocysteine and cysteine increased in pediatric NAFLD and strongly correlated with severity of liver damage. *Int J Mol Sci* 2014;**15**:21202-14.

11 Rodriguez-Gallego E, Guirro M, Riera-Borrull M, *et al.* Mapping of the circulating metabolome reveals alpha-ketoglutarate as a predictor of morbid obesity-associated non-alcoholic fatty liver disease. *Int J Obes (Lond)* 2015;**39**:279-87.

12 Li H, Wang L, Yan X, *et al.* A proton nuclear magnetic resonance metabonomics approach for biomarker discovery in nonalcoholic fatty liver disease. *J Proteome Res* 2011;**10**:2797-806.

13 Tokushige K, Hashimoto E, Kodama K, *et al.* Serum metabolomic profile and potential biomarkers for severity of fibrosis in nonalcoholic fatty liver disease. *J Gastroenterol* 2013;**48**:1392-400.

14 Barr J, Vazquez-Chantada M, Alonso C, *et al.* Liquid chromatography-mass spectrometry-based parallel metabolic profiling of human and mouse model serum reveals putative biomarkers associated with the progression of nonalcoholic fatty liver disease. *J Proteome Res* 2010;**9**:4501-12.

15 Puri P, Daita K, Joyce A, *et al.* The presence and severity of nonalcoholic steatohepatitis is associated with specific changes in circulating bile acids.

*Hepatology* 2017.

16 Kalhan SC, Guo L, Edmison J, *et al.* Plasma metabolomic profile in nonalcoholic fatty liver disease. *Metabolism* 2011;**60**:404-13.

17 Caussy C, Hsu C, Lo MT, *et al.* Novel link between gut-microbiome derived metabolite and shared gene-effects with hepatic steatosis and fibrosis in NAFLD.

*Hepatology* 2018.

18 Soga T, Sugimoto M, Honma M, *et al.* Serum metabolomics reveals gamma-glutamyl dipeptides as biomarkers for discrimination among different forms of liver disease. *J Hepatol* 2011;**55**:896-905.

19 Hoyles L, Fernandez-Real JM, Federici M, *et al.* Molecular phenomics and metagenomics of hepatic steatosis in non-diabetic obese women. *Nat Med* 2018;**24**:1070-80.

20 Troisi J, Pierri L, Landolfi A, *et al.* Urinary Metabolomics in Pediatric Obesity and NAFLD Identifies Metabolic Pathways/Metabolites Related to Dietary Habits and Gut-Liver Axis Perturbations. *Nutrients* 2017;**9**.

21 Dong S, Zhan ZY, Cao HY, *et al.* Urinary metabolomics analysis identifies key biomarkers of different stages of nonalcoholic fatty liver disease. *World J Gastroenterol* 2017;**23**:2771-84.

22 Han J, Dzierlenga AL, Lu Z, *et al.* Metabolomic profiling distinction of human nonalcoholic fatty liver disease progression from a common rat model. *Obesity (Silver Spring)* 2017;**25**:1069-76.

23 Schofield Z, Reed MA, Newsome PN, *et al.* Changes in human hepatic

metabolism in steatosis and cirrhosis. *World J Gastroenterol* 2017;**23**:2685-95.

24 Garcia-Canaveras JC, Donato MT, Castell JV, *et al.* A comprehensive untargeted metabonomic analysis of human steatotic liver tissue by RP and HILIC chromatography coupled to mass spectrometry reveals important metabolic alterations. *J Proteome Res* 2011;**10**:4825-34.

25 Aranha MM, Cortez-Pinto H, Costa A, *et al.* Bile acid levels are increased in the liver of patients with steatohepatitis. *Eur J Gastroenterol Hepatol* 2008;**20**:519-25.
